# Supplementary material
Source: PubMed Central journal article supplement (PMC3607165)
Supplement: tjp0591-1447-SD1.pdf [file tjp0591-1447-SD1.pdf]

**Endothelial alkalinisation inhibits gap junction communication and endothelium-derived hyperpolarisations in mouse mesenteric arteries**

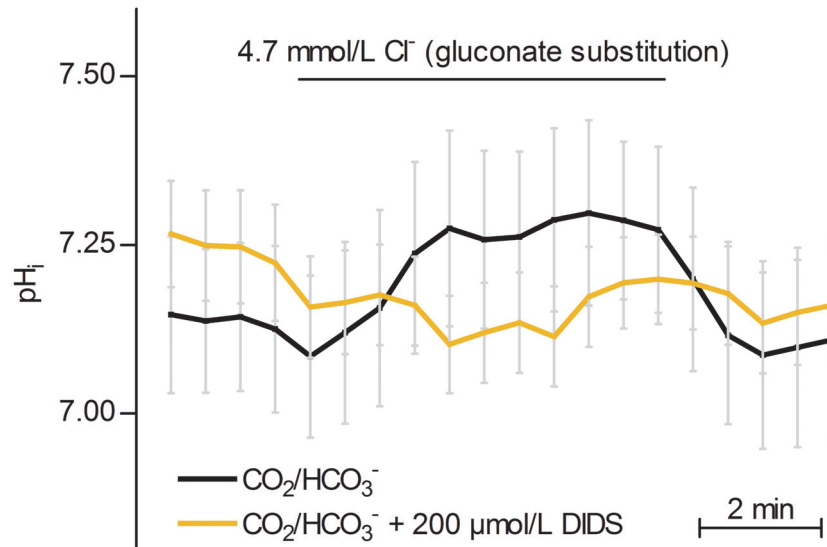

**Supplementary Figure 1.** Reducing the extracellular  $[Cl^-]$  from 121.9 mmol/L to 4.7 mmol/L by substitution with gluconate caused endothelial alkalinisation, which could be inhibited by prior application of 200  $\mu mol/L$  DIDS. Average  $pH_i$  responses are shown ( $n=5$ ); the vertical lines represent SEM.

**Endothelial alkalinisation inhibits gap junction communication and endothelium-derived hyperpolarisations in mouse mesenteric arteries**

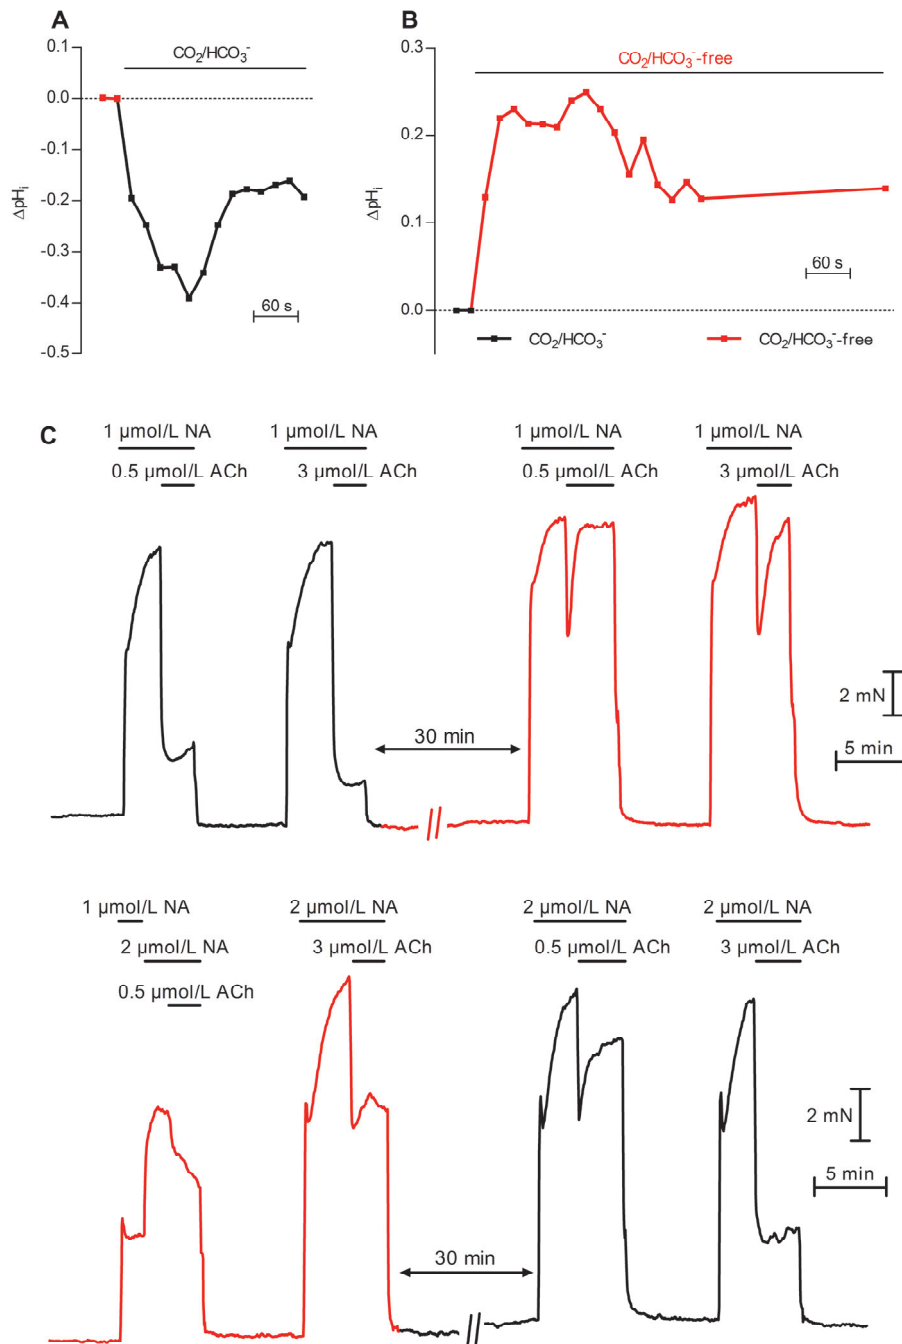

**Supplementary Figure 2.** Effects of intracellular alkalinisation were studied at steady-state and resulted in reversible inhibition of endothelium-dependent vasorelaxation. **A.+ B.** Original traces showing the  $\text{pH}_i$  effects of extracellular addition (A) or omission (B) of  $\text{CO}_2/\text{HCO}_3^-$ . **C.** Original traces showing the protocol used to investigate the effect of  $\text{CO}_2/\text{HCO}_3^-$ -free conditions on acetylcholine (ACh)-induced endothelium-dependent vasorelaxation of noradrenaline (NA)-precontracted arteries in the presence of 100  $\mu\text{mol/L}$  L-NAME. The effect of omitting or restoring  $\text{CO}_2/\text{HCO}_3^-$  was investigated 30 minutes after the buffer change to allow a new steady-state  $\text{pH}_i$  level to be reached; the order of the experimental protocol was alternated between preparations. Omission of  $\text{CO}_2/\text{HCO}_3^-$  reversibly inhibited endothelium-dependent vasorelaxation. Black lines indicate  $\text{CO}_2/\text{HCO}_3^-$ -containing conditions while red lines indicate  $\text{CO}_2/\text{HCO}_3^-$ -free conditions.

**Endothelial alkalinisation inhibits gap junction communication and endothelium-derived hyperpolarisations in mouse mesenteric arteries**

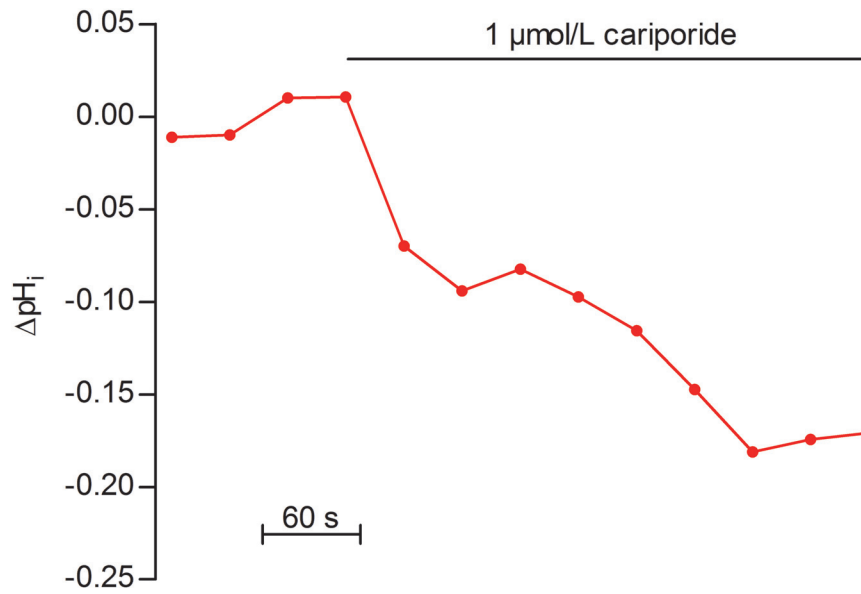

**Supplementary Figure 3.** Time course of the  $pH_i$  change following addition of the NHE1-selective inhibitor cariporide in the absence of  $\text{CO}_2/\text{HCO}_3^-$ .

**Endothelial alkalinisation inhibits gap junction communication and endothelium-derived hyperpolarisations in mouse mesenteric arteries**

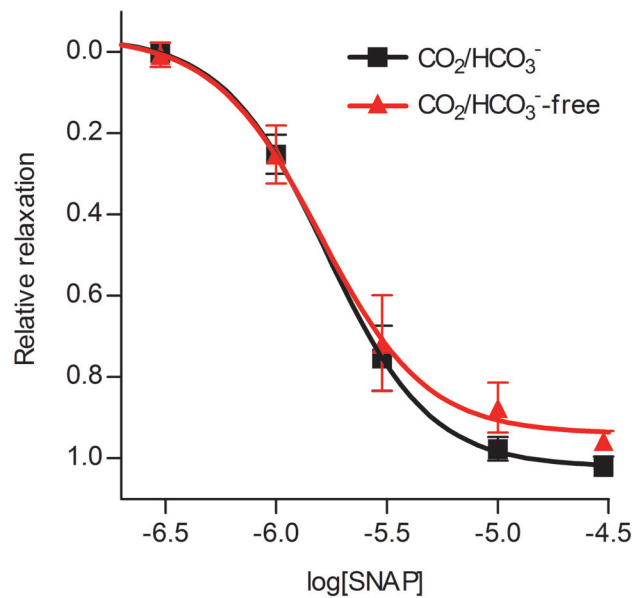

**Supplementary Figure 4.** The endothelium-independent vasorelaxation to the NO-donor SNAP was unaffected by omission of CO<sub>2</sub>/HCO<sub>3</sub><sup>-</sup>. Experiments were performed on noradrenaline-precontracted arteries in the presence and absence of CO<sub>2</sub>/HCO<sub>3</sub><sup>-</sup>. The response to SNAP was investigated at least 30 minutes after the change of bath solution to allow pH<sub>i</sub> to reach a new steady-state level. The concentration-response relationships were analysed by sigmoidal curve-fits and the derived logEC<sub>50</sub>-values and maximum-responses compared by extra sum-of-squares *F*-tests. No significant differences between the responses seen in the presence and absence of CO<sub>2</sub>/HCO<sub>3</sub><sup>-</sup> were observed (n=6). Vertical lines represent SEM.

**Endothelial alkalinisation inhibits gap junction communication and endothelium-derived hyperpolarisations in mouse mesenteric arteries**

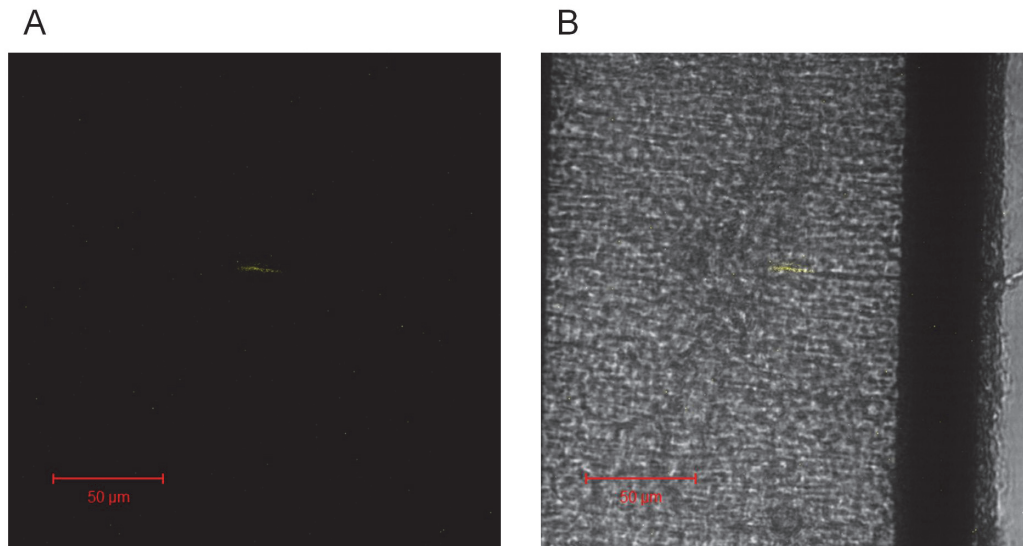

**Supplementary Figure 5.** Staining of a VSMC nucleus is seen following impalement from the adventitial side of a mouse mesenteric artery with an electrode containing propidium iodide. The thin nucleus running perpendicular to the axis of the artery is characteristic of a VSMC and clearly distinguishable from the rounder EC nuclei, which are oriented more parallel to the axis of the artery (see Figure 8A,B). **A.** Fluorescence image. **B.** Overlay image of the fluorescence image and a differential interference contrast image showing the axis of the artery.
